# Supplementary material for: A comparison of two cleaning methods applied in a small animal hospital
Source: Springer Nature journal article supplement (doi:10.1186/s12917-025-04631-0), 2025-03-15
Supplement: MOESM1 [file 12917_2025_4631_MOESM1_ESM.pdf]

**Additional file 1: relationship between the bacterial load on the floors before cleaning and the bacterial load on the walls before cleaning and time the cage was empty before cleaning**

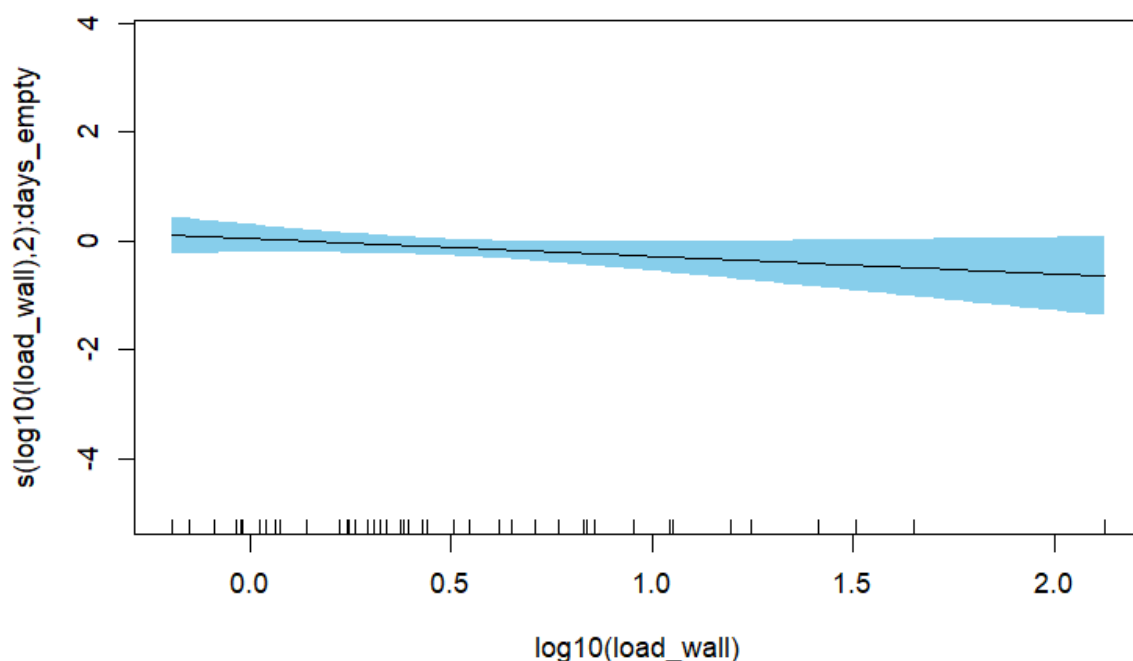

The relationship between the bacterial load on the floors before cleaning and the bacterial load on the walls before cleaning and time the cage was empty before cleaning. The y-axis (days) shows the spline effect (s) of the interaction of the  $\log_{10}$ -transformed bacterial load on the walls by the time the cage was empty before cleaning. The x-axis shows the bacterial load on the walls in  $\log_{10}$  CFU/cm<sup>2</sup>. X-values are plotted along the bottom of the plot. The full line shows the nonlinear relationship (edf:2) between the time the cage was empty before cleaning (the interaction of the  $\log_{10}$ -transformed bacterial load on the wall by time the cage was empty before cleaning) and the  $\log_{10}$ -transformed bacterial load on the wall. The blue shade shows the 95% confidence interval for the mean shape of the effect.
